# Supplementary material
Source: PubMed Central journal article supplement (PMC2928899)
Supplement: jc.2010-0195_1.pdf [file jc.2010-0195_1.pdf]

## **Legend to Supplemental Data**

### **Supplemental Figure 1**

**DBP attenuates responses to vitamin D metabolites at various stages of monocyte maturation.** Human monocytes cultured in RPMI supplemented with 10% FBS and 10 U/ml GM-CSF for 1, 7 and 10 days were treated with 25OHD<sub>3</sub> (200 nM) or vehicle (0.2% ethanol) for 6 hrs with: 1) DBP (2 μM DBP + 8 μM BSA); or 2) no DBP (10 μM BSA). Expression of CYP24 mRNA was then analyzed by RT-PCR. Data are shown as mean changes in mRNA levels (RT-PCR  $\Delta\Delta$ Ct values) relative to vehicle-treated cells. \*\*\* = statistically different from DBP-treated cells, P < 0.001.

### **Supplemental Figure 2**

**DBP attenuates responses to vitamin D metabolites in unstimulated and IL-15 stimulated monocytes.** Human monocytes were cultured in RPMI supplemented with 10% FBS and 10U/ml GM-CSF in the presence or absence of interleukin-15 (IL-15) (300ng/ml) for 2 days. The resulting cells were then treated with 25OHD<sub>3</sub> (200 nM) or vehicle (0.2% ethanol) for 6 hrs under the following conditions: 1) DBP (2 μM DBP + 8 μM BSA); or 2) no DBP (10 μM BSA). Expression of CYP24 mRNA was then analyzed by RT-PCR. Data are shown as mean changes in mRNA levels (RT-PCR  $\Delta\Delta$ Ct values) relative to vehicle-treated cells. \*\*\* = statistically different from DBP-treated cells, P < 0.001.

### **Supplemental Table 1**

**Vitamin D status of human serum samples used in study.** Black (n=10) and white (n=10), sex (male) and age-matched (30-39 years) serum was purchased from a commercial vendor (Innovative Research, Novi, Michigan). DBP phenotype (Gc type) was determined by isoelectric focusing and ligand concentration measured by radioimmuno assay. Vitamin D insufficiency was defined as serum 25OHD<sub>3</sub> concentrations below 30 ng/ml (75 nM). There were no statistically significant variation in either 25OHD<sub>3</sub> or 1,25(OH)<sub>2</sub>D<sub>3</sub> serum levels between the different DBP/Gc genotypes.

Fig 1.

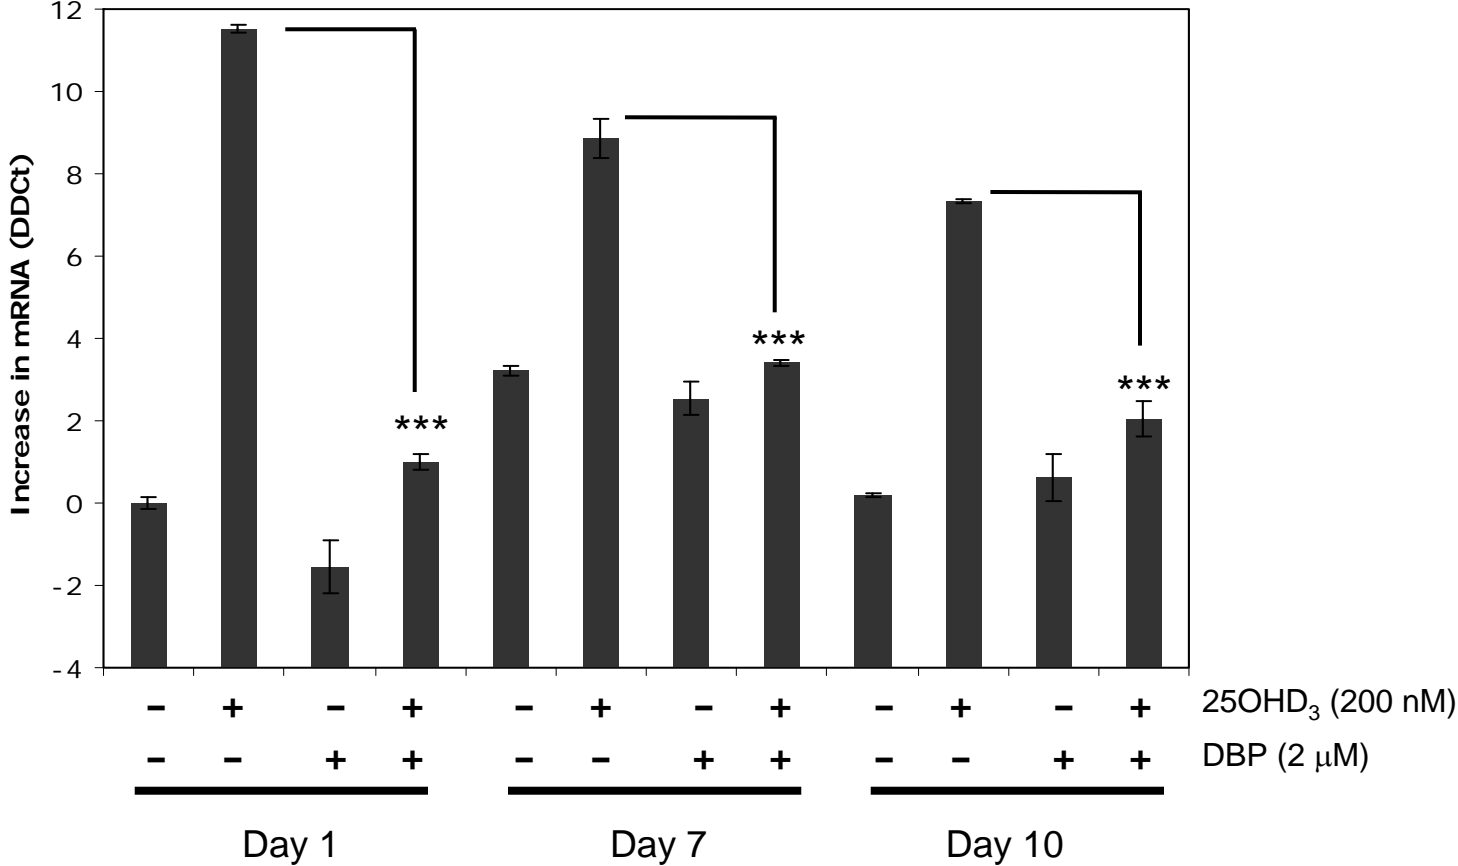

Fig. 2

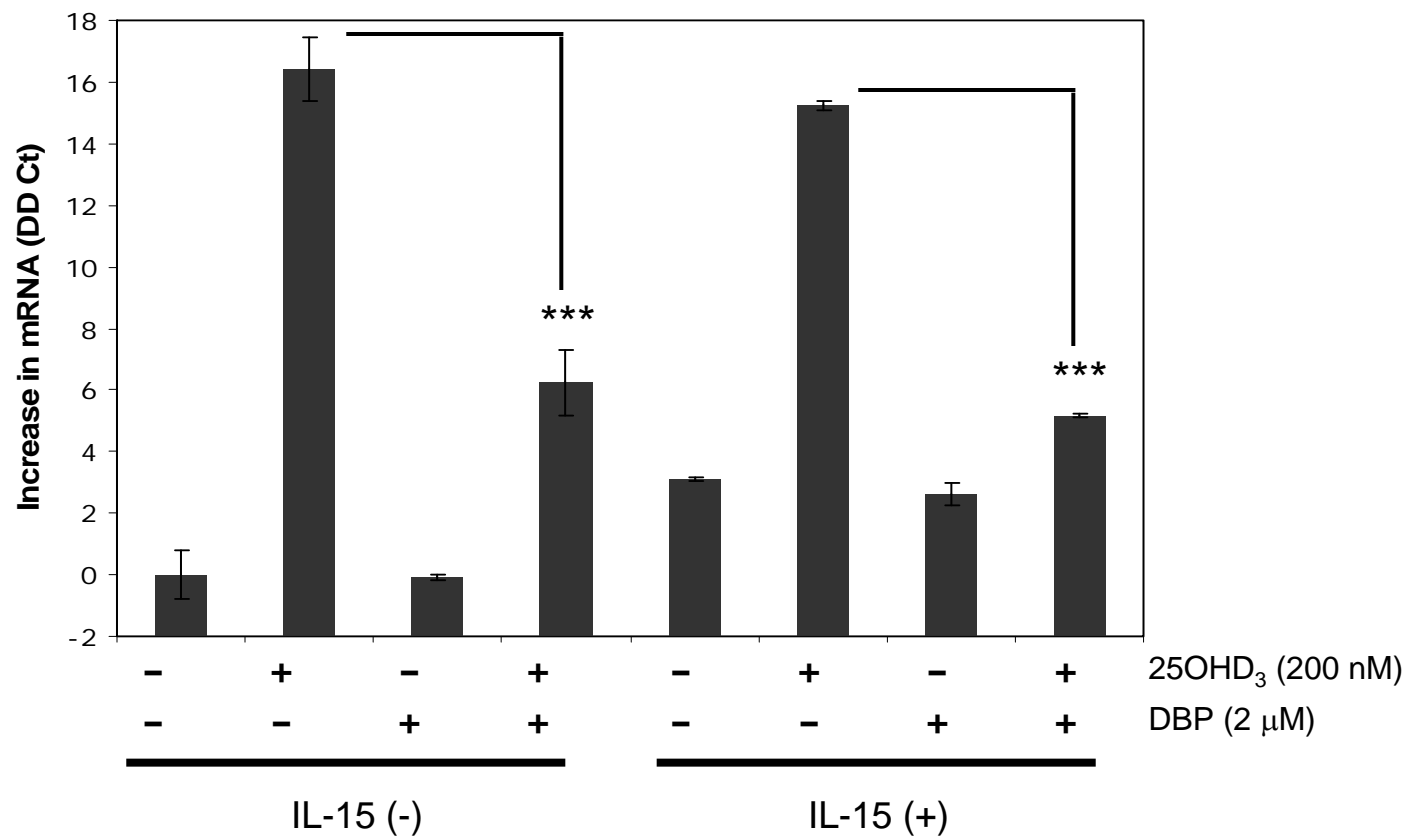

Table 1.

| serum # | ethnic | genotype | 25D (nM) | 1,25D (nM) | 25D status   |
|---------|--------|----------|----------|------------|--------------|
| 1       | black  | Gc 1F-1F | 52.4     | 0.161      | insufficient |
| 2       | black  | Gc 1F-1F | 114.8    | 0.144      | sufficient   |
| 3       | black  | Gc 1S-1F | 40.2     | 0.095      | insufficient |
| 4       | black  | Gc 1F-1F | 89.1     | 0.198      | sufficient   |
| 5       | black  | Gc 1S-1S | 43.2     | 0.143      | insufficient |
| 6       | white  | Gc 2-1S  | 46.2     | 0.133      | insufficient |
| 7       | white  | Gc 2-1S  | 69.4     | 0.088      | insufficient |
| 8       | white  | Gc 1S-1S | 56.7     | 0.146      | insufficient |
| 9       | white  | Gc 1S-1S | 79.4     | 0.113      | sufficient   |
| 10      | white  | Gc 2-1S  | 50.4     | 0.124      | insufficient |
| 11      | black  | Gc 1S-1F | 71.1     | 0.125      | insufficient |
| 12      | black  | Gc 2-1S  | 48.2     | 0.077      | insufficient |
| 13      | black  | Gc 1S-1F | 67.9     | 0.135      | insufficient |
| 14      | black  | Gc 1F-1F | 45.9     | 0.061      | insufficient |
| 15      | black  | Gc 1S-1F | 39.9     | 0.101      | insufficient |
| 16      | white  | Gc 2-1F  | 59.4     | 0.103      | insufficient |
| 17      | white  | Gc 2-1F  | 63.6     | 0.112      | insufficient |
| 18      | white  | Gc 1S-1F | 90.9     | 0.115      | sufficient   |
| 19      | white  | Gc 1S-1S | 80.9     | 0.131      | sufficient   |
| 20      | white  | Gc 2-1F  | 62.4     | 0.125      | insufficient |
